# Supplementary material
Source: PubMed Central journal article supplement (PMC3234984)
Supplement: supp_M111.298711_jbc.M111.298711-5.pdf [file supp_M111.298711_jbc.M111.298711-5.pdf]

**Supplementary Table 1:** Plasmids used in this study.

| Plasmid                        | Characteristics                                                                                                                   | Source or Reference |
|--------------------------------|-----------------------------------------------------------------------------------------------------------------------------------|---------------------|
| pET22b                         | Ap <sup>r</sup> <i>lacI</i> cloning vector harboring T7 promoter and terminator with pBR322 and fl origin.                        | Novagen             |
| pET22b-BprV (Strain: VCS1703A) | pET22b (NdeI/XhoI) harbouring 1.4 kb fragment encoding 1 – 476 residues of the BprV precursor.                                    | Recombinant         |
| pET22b-BprB (Strain: CS101)    | pET22b (NdeI/XhoI) harbouring 1.4 kb fragment encoding 1 – 476 residues of the BprB precursor.                                    | Recombinant         |
| pET22b-BprB.D180G              | pET22b (NdeI/XhoI) harbouring 1.4 kb fragment encoding 1 – 476 residues of the BprB precursor with a D180G substitution.          | Recombinant         |
| pET22b-BprB.D182G              | pET22b (NdeI/XhoI) harbouring 1.4 kb fragment encoding 1 – 476 residues of the BprB precursor with a D182G substitution.          | Recombinant         |
| pET22b-BprB.D180G.D182G        | pET22b (NdeI/XhoI) harbouring 1.4 kb fragment encoding 1 – 476 residues of the BprB precursor with D180G and D182G substitutions. | Recombinant         |
