# Supplementary material
Source: PubMed Central journal article supplement (PMC3234984)
Supplement: supp_M111.298711_jbc.M111.298711-6.pdf [file supp_M111.298711_jbc.M111.298711-6.pdf]

**Supplementary Table 2:** Primers used in this study. Underline sequence indicates restriction site and bold sequence indicate the substituted codon.

| Sequence (5'-3')                                 | Location                                  |
|--------------------------------------------------|-------------------------------------------|
| GACAGAATTCC <u>CATATGAATCTATCGAACATTTCTGCGG</u>  | BprV and BprB<br>5' region                |
| CTGTAAGCTT <u>CTCGAGACGATTTTGATCGCCTAAAACAGC</u> | BprV and BprB<br>3' region                |
| GAGTTTGGGCGGCG <b>AC</b> GGTGGTTGTTAC            | BprB.D180G<br>mutagenesis<br>(sense)      |
| GCGTTGTGAAC <b>TTTGTGAACAACCACCGTCG</b>          | BprB.D180G<br>mutagenesis<br>(anti-sense) |
| GTTATTAATATGAGTTTGGGCGGCGGCGGT <b>GATTG</b>      | BprB.D182G<br>mutagenesis<br>(sense)      |
| GAACTTTGTGAACA <b>ATC</b> ACCGCCGCGCCC           | BprB.D182G<br>mutagenesis<br>(sense)      |
