# Supplementary material
Source: PubMed Central journal article supplement (PMC3234984)
Supplement: supp_M111.298711_jbc.M111.298711-7.pdf [file supp_M111.298711_jbc.M111.298711-7.pdf]

**Supplementary Table 3:** Data-collection statistics for crystal of BprV and BprB. Values in parentheses are for the highest resolution shell. These data have previously been reported in Wong et al., 2010 (1).

|                                 | BprV                     | BprB                     |
|---------------------------------|--------------------------|--------------------------|
| Wavelength (Å)                  | 1.54178                  | 1.54178                  |
| Resolution range (Å)            | 29.2 – 2.0 (2.11 – 2.00) | 24.4 – 1.8 (1.90 – 1.80) |
| Observed/unique reflections     | 90202/20040              | 126861/24844             |
| Multiplicity                    | 4.5 (4.4)                | 5.1 (4.4)                |
| I/σ(I)                          | 21.2 (6.4)               | 23.8 (5.8)               |
| Completeness (%)                | 99.9 (99.0)              | 94.7 (83.9)              |
| R <sub>merge</sub> <sup>†</sup> | 0.060 (0.205)            | 0.057 (0.216)            |

<sup>†</sup>  $R_{\text{merge}} = \frac{\sum_{hkl} \sum_i |I_i(hkl) - (I(hkl))|}{\sum_{hkl} \sum_i I_i(hkl)}$ , where  $I_i(hkl)$  and  $(I(hkl))$  represent the diffraction-intensity values of the individual measurements and the corresponding mean values.

1. Wong, W., Kennan, R. M., Rosado, C. J., Rood, J. I., Whisstock, J. C., and Porter, C. J. (2010) *Acta Crystallogr Sect F Struct Biol Cryst Commun* **66**, 289-293
