# Supplementary material
Source: PubMed Central journal article supplement (PMC3234984)

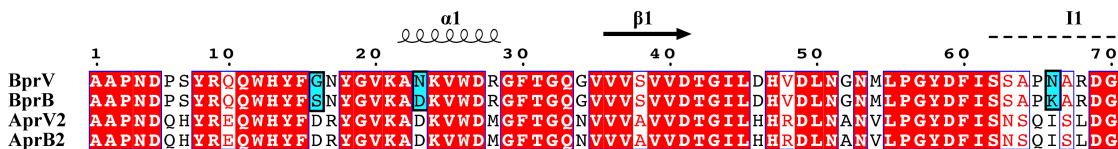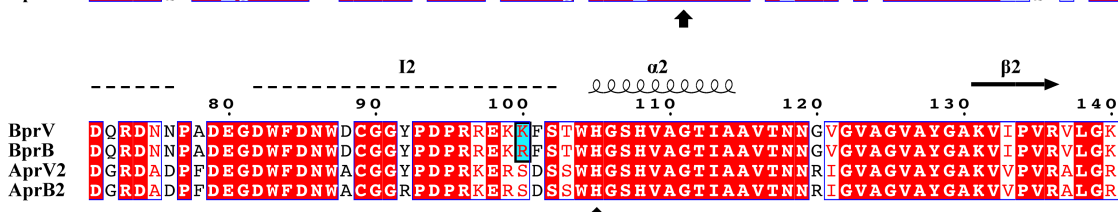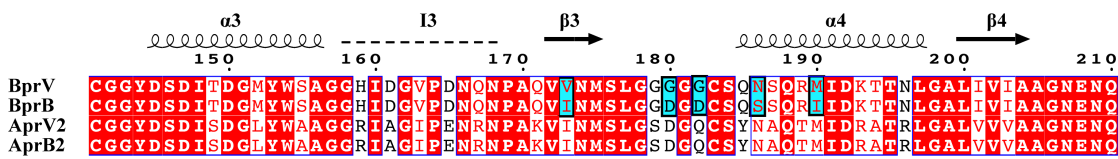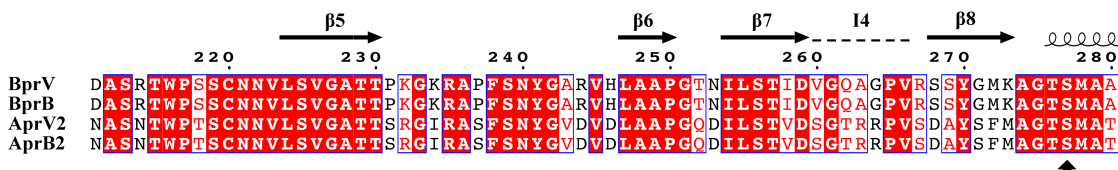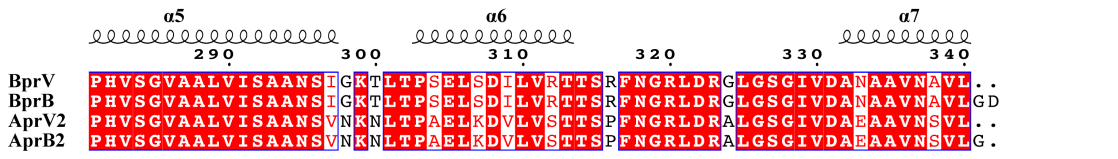

Supplement: supp_M111.298711_jbc.M111.298711-2.pdf [file supp_M111.298711_jbc.M111.298711-2.pdf]

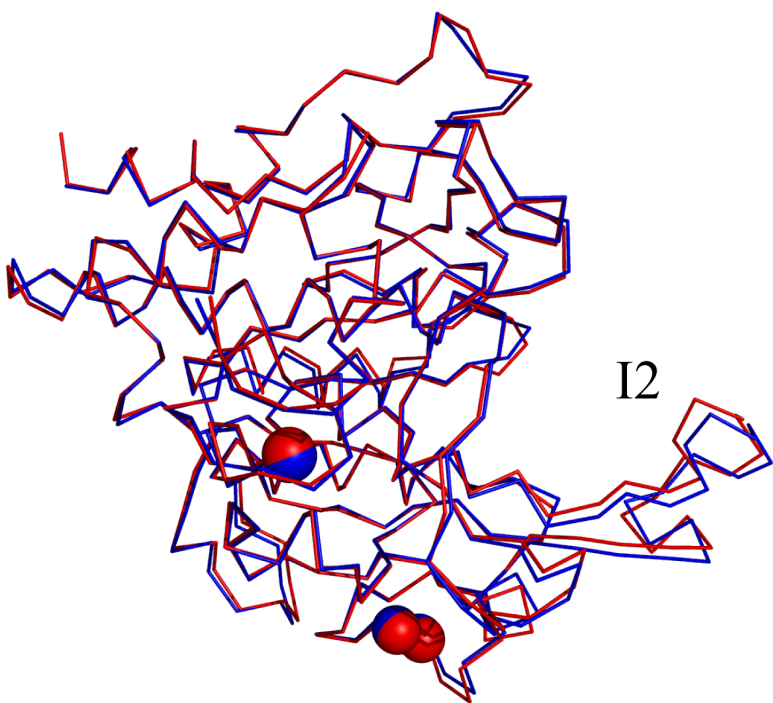

I2

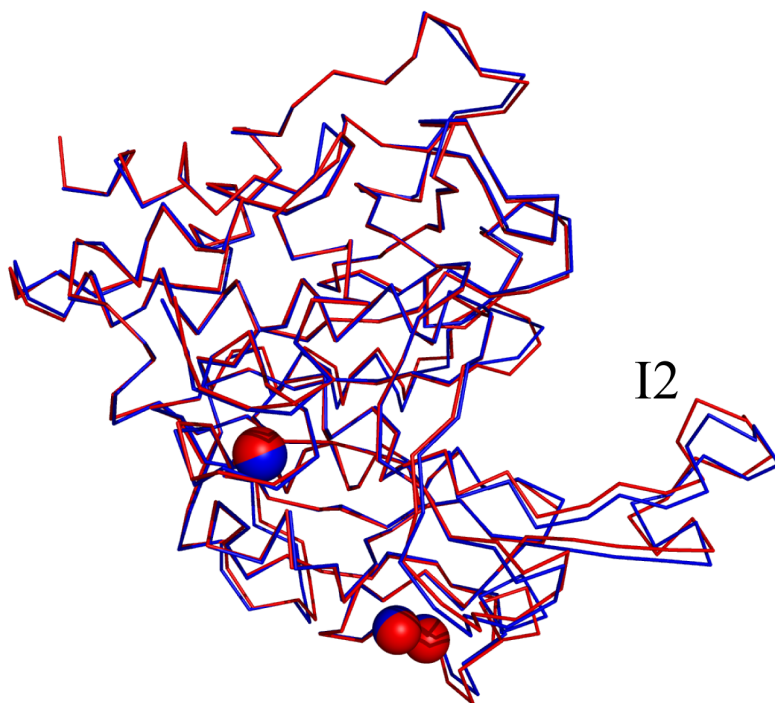

I2

Supplement: supp_M111.298711_jbc.M111.298711-3.pdf [file supp_M111.298711_jbc.M111.298711-3.pdf]

**A**

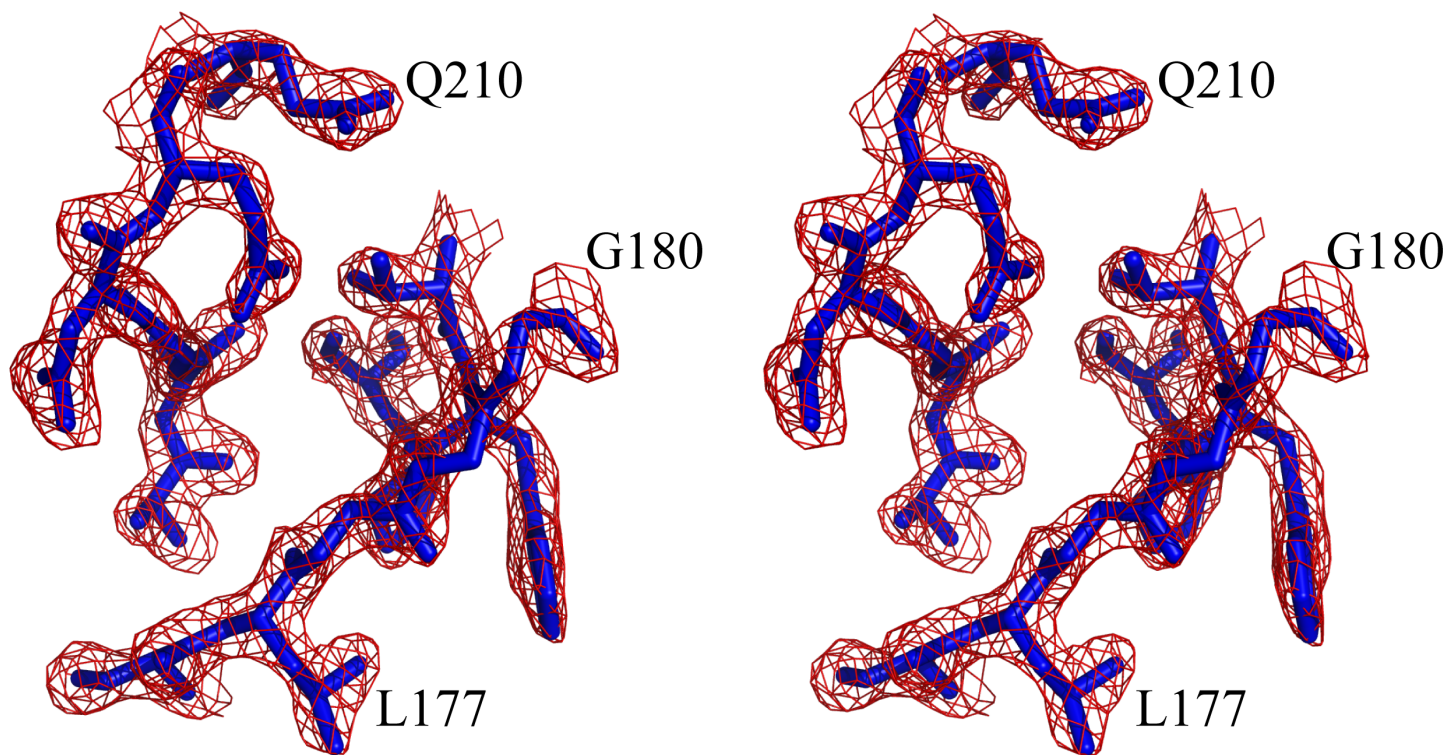

**B**

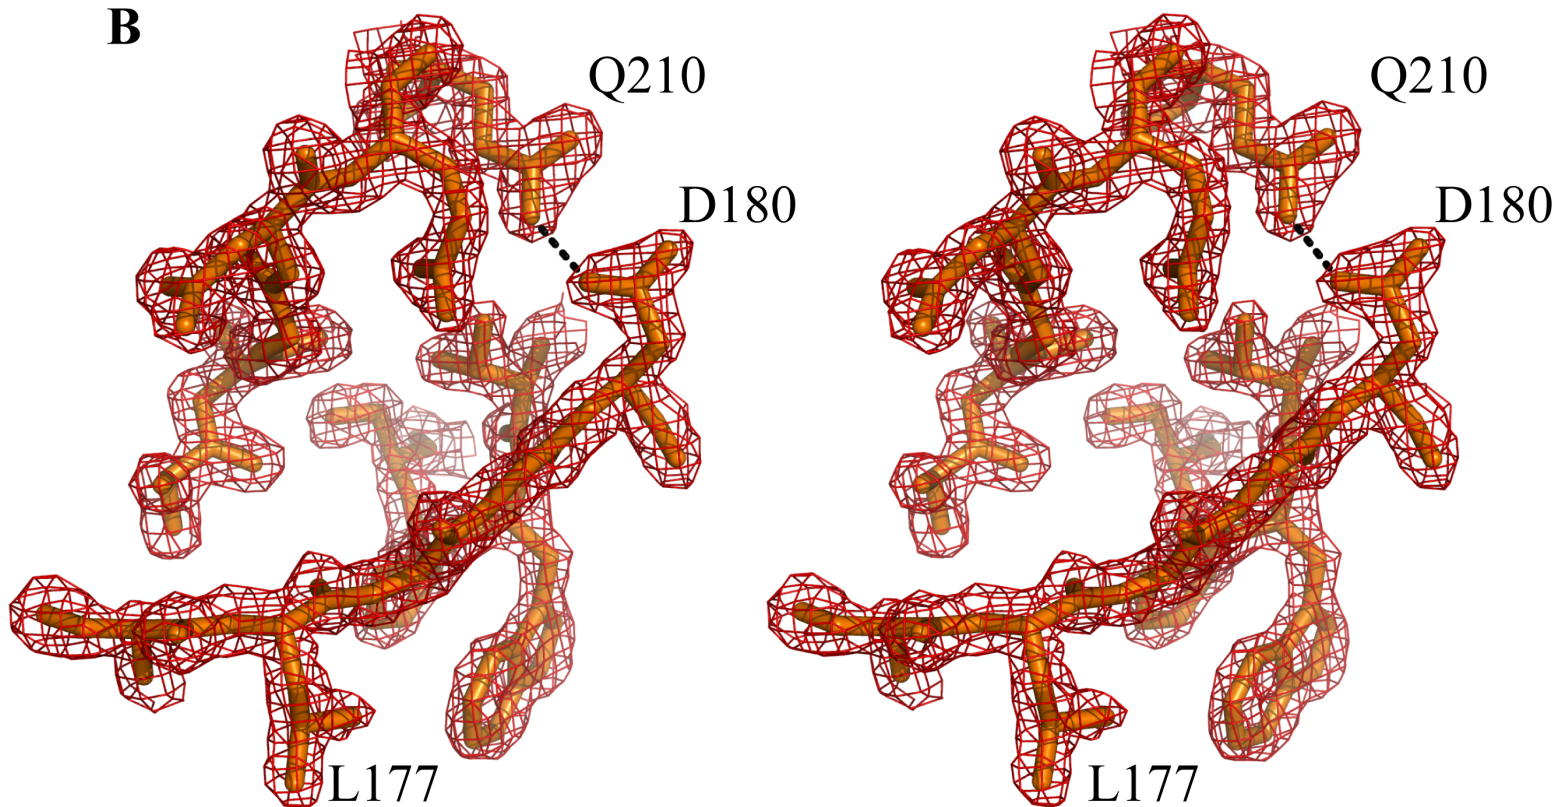

Supplement: supp_M111.298711_jbc.M111.298711-4.pdf [file supp_M111.298711_jbc.M111.298711-4.pdf]
